# Supplementary material
Source: Elsevier journal article supplement (http://natap.org/2019/HIV/mmc1.pdf)
Supplement: mmc1 [file mmc1.pdf]

# THE LANCET HIV

## Supplementary appendix

This appendix formed part of the original submission and has been peer reviewed. We post it as supplied by the authors.

Supplement to: Stellbrink H-J, Arribas JR, Stephens JL, et al. Co-formulated bictegravir, emtricitabine, and tenofovir alafenamide versus dolutegravir with emtricitabine and tenofovir alafenamide for initial treatment of HIV-1 infection: week 96 results from a randomised, double-blind, multicentre, phase 3, non-inferiority trial. *Lancet HIV* 2019; published online May 5. [http://dx.doi.org/10.1016/S2352-3018\(19\)30080-3](http://dx.doi.org/10.1016/S2352-3018(19)30080-3).

## Appendices

We thank the following GS-US-380-1490 Investigators and their staff:

Albrecht H (Palmetto Health Richland, SC, US), Angel J (The Ottawa Hospital - General Campus, CN), Antela Lopez A (Hospital Clinico Universitario de Santiago, ES), Antinori A (IRCCS Istituto Nazionale per le Malattie Infettive "Lazzaro Spallanzani", IT), Arastéh K (EPIMED GmbH, DE), Arribas Lopez JR (Hospital Universitario La Paz, ES), Asmuth DM (CARES Community Health, CA, US), Bartczak J (Rowan Tree Medical, P.A., FL, US), Baumgarten A (Zibp Zentrum fur Infektiologie Berlin Prenzlauer Berg GmbH , DE), Benson P (Be Well Medical Center, MI, US), Berhe M (North Texas Infectious Diseases Consultants, PA, TX, US), Bordon J (Providence Hospital – DC, Washington DC, US), Brar I (Henry Ford Hospital, MI, US), Brinson C (Central Texas Clinical Research, TX, US), Brunetta J (Maple Leaf Research/Maple Leaf Medical Clinic, CN), Charest L (Clinique Medicale L'Actuel, CN), Cindrich R (Bronx Lebanon Hospital Center, NY, US), Clarke Ae (Brighton and Sussex University Hospitals NHS Trust, UK), Clotet Sala B (Hospital Universitari Germans Trias i Pujol, ES), Cook PP (East Carolina University, The Brody School of Medicine, Division of Infectious Diseases, NC, US), Cotte L (Hôpital de la Croix Rousse, France), Coulston DR (Premier Clinical Research, WA, US), Crofoot Jr GE (Gordon E. Crofoot MD PA, TX, US), Cruickshank FA (Rosedale Infectious Diseases, NC, US), Cunningham DL (Pueblo Family Physicians, AZ, US), Daar E (Los Angeles Biomedical Research Institute at Harbor-UCLA Medical Center, CA, US), De Wet JJ (Spectrum Health, CN), DeJesus E (Orlando Immunology Center, FL, US), Dietz C (Kansas City CARE Clinic, MO, US), Edelstein H (Highland Hospital - Alameda Health System, CA, US), Estrada Perez V (Hospital Clinico San Carlos, ES), Fichtenbaum C (University of Cincinnati College of Medicine, Clinical Trials Unit, Division of Infectious Diseases, OH, US), Flamm J (Kaiser Permanente, CA, US), Gallant JE (Southwest CARE Center, NM, US), Gathe Jr, JC (Therapeutic Concepts, TX, US), Girard P-M (Hopital Saint-Antoine, France), Grossberg R (Montefiore Medical Center, NY, US), Gupta SK (Indiana University, Infectious Diseases Research, IN, US), Hagins DP (Chatham County Health Department, GA, US), Hardy WD (Whitman-Walker Health, Washington, DC, US), Hare CB (Kaiser Permanente Medical Center,

Clinical Trials Unit, CA, US), Henry WK (Hennepin County Medical Center, Positive Care Clinic, MN, US), Hileman C (MetroHealth Medical Center, OH, US), Hite AA (Summa Health System, C.A.R.E. Center, OH, US), Hsiao C-B (Positive Health Clinic - Federal North Building, PN, US), Jain M (UT Southwestern Medical Center, Amelia Court HIV Research Clinic, TX, US), Johnson MA (Royal Free London NHS Foundation Trust, UK), Kasper K (Winnipeg Regional Health Authority - Health Sciences Centre Winnipeg, CN), Kinder CA (AHF-Kinder Medical Group, FL, US), Klein D (Kaiser Permanente, Department of Infectious Diseases, CA, US), Koenig E (Instituto Dominicano de Estudios Virologicos (IDEV), Zona Universitaria, DO), LaMarca A (Therafirst Medical Center, FL, US), Lazzarin A (IRCCS Ospedale San Raffaele - Dipartimento di Malattie Infettive, IT), LeBlanc RP (Clinique OPUS Inc., CN), Lebouché B (Chronic Viral Illness Service/McGill University Health Centre (MUHC), CN), Lucasti C (South Jersey Infectious Disease, NJ, US), Maggiolo F (ASST Papa Giovanni XXII, Piazza OMS 1, IT), Mallolas Masferrer J (Hospital Clinic de Barcelona, ES), Mayer CA (St. Joseph's Comprehensive, Research Institute, FL, US), McDonald C (Tarrant County Infectious Disease Associates, TX, US), McGowan J (North Shore University Hospital/Division of Infectious Diseases, NY, US), Meybeck A (CH de Tourcoing, France), Mills A (Mills Clinical Research, CA, US), Miralles Alvarez C (Hospital Alvaro Cunqueiro, ES), Molina J-M (Hopital Saint-Louis, France), Moreno Guillen S (Hospital Universitarion Ramon y Cajal, ES), Mounzer K (Philadelphia FIGHT, PN, US), Newman CL (Augusta University, GA, US), Orkin C (Barts Health NHS Trust, Ambrose King Centre, Royal London Hospital, UK), Osiyemi O (Triple O Research Institute, P.A., FL, US), Palmieri PJ (Upstate Infectious Diseases Associates, LLP, NY, US), Para M (The Ohio State University Medical Center, OH, US), Parks DA (Southampton Clinical Research Group, INC, MO, US), Parsons C (University Medical Center - New Orleans, LA, US), Petroll AE (Medical College of Wisconsin, WI, US), Pierone Jr G (AIDS Research and Treatment Center of the Treasure Coast, FL, US), Podzamczar D (Hospital Universitari de Bellvitge, ES), Polk C (ID Consultants, NC, US), Portilla Sogorb J (Hospital General Universitario de Alicante, ES), Post FA (King's College Hospital, NHS Foundation Trust, UK), Pozniak AL (Chelsea & Westminster NHS Trust, UK), Prelutsky DJ (Southampton Healthcare,

Inc, MO, US), Pugliese P (CHU Nice - Hopital Archet 1, France), Rachlis A (Sunnybrook Health Sciences Centre , CN), Ramgopal M (Midway Immunology and Research Center, FL, US), Rashbaum B (Capital Medical Associates. PC, Washington, DC, US), Richmond GJ (Gary J. Richmond, M.D., P.A., FL, US), Rivero Roman A (Hospital Universitario Reina Sofia, ES), Roberts A (Medical Faculty Associates , Washington, DC, US), Rockstroh J (Universitätsklinikum Bonn (AoR), DE), Ross JDC (Queen Elizabeth Medical Centre, Edgbaston, UK), Ruane PJ (Ruane Clinical Research Group Inc., CA, US), Rubio R (Hospital Universitario 12 de Octubre, ES), Saag MS (University of Alabama Birmingham, AL, US), Salazar L (St. Jude Hospital Yorba Linda DBA, St. Joseph Heritage Healthcare, CA, US), Santana-Bagur JL (Proyecto ACTU, School of Medicine, University of Puerto Rico, PR, US), Santiago Colon L (HOPE Clinical Research, PR, US), Schrader S (Research Access Network, TX, US), Scribner A (Clinic of Longview - Center for Clinical Research, TX, US), Shalit P (Peter Shalit, M.D., WA, US), Shamblaw D (La Playa Medical Group and Clinical Research, CA, US), Shon ASY (Erie County Medical Center, University at Buffalo, NY, US), Sims III J (St. Hope Foundation, TX, US), Slim J (Saint Michael's Medical Center, NJ, US), Stellbrink H-J (ICH Study Center, DE), Stephan C (Universitätsklinikum Frankfurt, Medizinische Klinik II Schwerpunkt Infektiologie, DE), Tebas-Medrano P (Perelman Center for Advanced Medicine at the Hospital of the University of Pennsylvania, PN, US), Thompson MA (AIDS Research Consortium of Atlanta, GA, US), Towner WJ (Kaiser Permanente Los Angeles Medical Center, Infectious Disease Department, CA, US), Ustianowski AP (Pennine Acute Hospitals NHS Trust, Royal Manchester General Hospital, UK), Van Dam C (Cone Health/Regional Center for Infectious Disease, NC, US), Vandekerckhove L (UZ Gent, Belgium), Vandercam B (Cliniques Universitaires UCL Saint-Luc, Belgium), Vanig TJ (Spectrum Medical Group, AZ, US), Voskuhl G (AIDS Arms Inc / Trinity Health and Wellness Center, TX, US), Wade BH (AHF-Pensacola, FL, US), Walker DK (Baystate Infectious Diseases Clinical Research, MA, US), Waters LJ (Central and North West London, NHS Foundation Trust, UK), Wilkin AM (Wake Forest Baptist Health, NC, US), Wohl D (NC TraCS Institute – CTRC, University of North Carolina at Chapel Hill, NC, US), Wohlfeiler MB (AIDS Healthcare Foundation - South Beach, FL, US), Workowski

K (Emory Hospital Midtown Infectious Disease Clinic, GA, US), , Wurapa AK (Infectious Disease Specialists of Atlanta, GA, US), Yazdanpanah Y (CHU Bichat, France), Young B (Apex Research LLC, CO, US), Zorrilla C (Maternal Infant Studies Center (CEMI), University of Puerto Rico, P, US), Zurawski C (Atlanta ID Group, PC, GA, US).

Appendix Table 1. Treatment differences in HIV-1 RNA <50 copies per mL at week 96 by subgroup

|                               | <b>Bictegravir group<br/>(n=320)</b> | <b>Dolutegravir group<br/>(n=325)</b> | <b>Test for interaction<br/>P-Value<sup>†</sup></b> |
|-------------------------------|--------------------------------------|---------------------------------------|-----------------------------------------------------|
| Overall                       | 84%                                  | 86%                                   |                                                     |
| Age (Years)                   |                                      |                                       | 0.41                                                |
| < 50                          | 225/264 (85%)                        | 230/266 (86%)                         |                                                     |
| ≥ 50                          | 44/56 (79%)                          | 51/59 (86%)                           |                                                     |
| Sex                           |                                      |                                       | 0.39                                                |
| Male                          | 238/280 (85%)                        | 254/288 (88%)                         |                                                     |
| Female                        | 31/40 (78%)                          | 27/37 (73%)                           |                                                     |
| Race                          |                                      |                                       | 0.78                                                |
| Black                         | 80/97 (82%)                          | 84/100 (84%)                          |                                                     |
| Nonblack                      | 189/223 (85%)                        | 197/225 (88%)                         |                                                     |
| Baseline HIV-1 RNA (c/mL)     |                                      |                                       | 0.67                                                |
| ≤ 100,000                     | 215/254 (85%)                        | 234/271 (86%)                         |                                                     |
| > 100,000                     | 54/66 (82%)                          | 47/54 (87%)                           |                                                     |
| Baseline CD4 Cell Count (/uL) |                                      |                                       | 0.36                                                |
| < 200                         | 38/44 (86%)                          | 32/34 (94%)                           |                                                     |
| ≥ 200                         | 231/276 (84%)                        | 249/291 (86%)                         |                                                     |
| Region                        |                                      |                                       | 0.79                                                |
| US                            | 160/193 (83%)                        | 166/193 (86%)                         |                                                     |
| Ex-US                         | 109/127 (86%)                        | 115/132 (87%)                         |                                                     |
| Study Drug Adherence (%)      |                                      |                                       | 0.75                                                |
| < 95                          | 67/85 (79%)                          | 70/86 (81%)                           |                                                     |
| ≥ 95                          | 202/227 (89%)                        | 211/237 (89%)                         |                                                     |

The Week 96 window is between Days 631 and 714 (inclusive).

<sup>†</sup> Test for interaction is based on the logistic regression model included baseline HIV-1 RNA stratum (≤ 100,000 vs. > 100,000 copies/mL) and region stratum (US vs. Ex-US) (if not the subgroup factor), subgroup, treatment, and the interaction between treatment and subgroup. P-value for the homogeneity test was from the Wald test of the interaction between treatment and subgroup.

For adherence, only subjects who returned at least 1 bottle and had calculable drug adherence were included in the percentage and p-value calculations.

Appendix Table 2. Study drug-related adverse events in ≥1 participant in either group

|                                             | <b>Bictegravir group<br/>(n=320)</b> | <b>Dolutegravir group<br/>(n=325)</b> |
|---------------------------------------------|--------------------------------------|---------------------------------------|
| Any study drug-related adverse event        | 64 (20.0%)                           | 92 (28.3%)                            |
| Nausea                                      | 10 (3.1%)                            | 17 (5.2%)                             |
| Headache                                    | 13 (4.1%)                            | 10 (3.1%)                             |
| Diarrhoea                                   | 10 (3.1%)                            | 11 (3.4%)                             |
| Fatigue                                     | 7 (2.2%)                             | 7 (2.2%)                              |
| Dizziness                                   | 7 (2.2%)                             | 3 (0.9%)                              |
| Flatulence                                  | 3 (0.9%)                             | 7 (2.2%)                              |
| Abdominal distension                        | 3 (0.9%)                             | 5 (1.5%)                              |
| Insomnia                                    | 7 (2.2%)                             | 1 (0.3%)                              |
| Constipation                                | 3 (0.9%)                             | 4 (1.2%)                              |
| Dyspepsia                                   | 3 (0.9%)                             | 3 (0.9%)                              |
| Hypercholesterolaemia                       | 3 (0.9%)                             | 3 (0.9%)                              |
| Proteinuria                                 | 4 (1.3%)                             | 2 (0.6%)                              |
| Abdominal discomfort                        | 2 (0.6%)                             | 3 (0.9%)                              |
| Decreased appetite                          | 2 (0.6%)                             | 3 (0.9%)                              |
| Vomiting                                    | 3 (0.9%)                             | 2 (0.6%)                              |
| Alopecia                                    | 2 (0.6%)                             | 2 (0.6%)                              |
| Asthenia                                    | 1 (0.3%)                             | 3 (0.9%)                              |
| Creatinine renal clearance decreased        | 3 (0.9%)                             | 1 (0.3%)                              |
| Depression                                  | 2 (0.6%)                             | 2 (0.6%)                              |
| Somnolence                                  | 2 (0.6%)                             | 2 (0.6%)                              |
| Abnormal dreams                             | 1 (0.3%)                             | 2 (0.6%)                              |
| Depressed mood                              | 3 (0.9%)                             | 0                                     |
| Hypoaesthesia                               | 0                                    | 3 (0.9%)                              |
| Malaise                                     | 2 (0.6%)                             | 1 (0.3%)                              |
| Pruritus generalised                        | 1 (0.3%)                             | 2 (0.6%)                              |
| Rash                                        | 2 (0.6%)                             | 1 (0.3%)                              |
| Abdominal pain                              | 0                                    | 2 (0.6%)                              |
| Abdominal pain upper                        | 1 (0.3%)                             | 1 (0.3%)                              |
| Anaemia                                     | 1 (0.3%)                             | 1 (0.3%)                              |
| Anxiety                                     | 1 (0.3%)                             | 1 (0.3%)                              |
| Arthralgia                                  | 2 (0.6%)                             | 0                                     |
| Blood creatinine increased                  | 1 (0.3%)                             | 1 (0.3%)                              |
| Chest pain                                  | 1 (0.3%)                             | 1 (0.3%)                              |
| Hyperuricaemia                              | 0                                    | 2 (0.6%)                              |
| Immune reconstitution inflammatory syndrome | 2 (0.6%)                             | 0                                     |
| Myalgia                                     | 0                                    | 2 (0.6%)                              |
| Neutropenia                                 | 0                                    | 2 (0.6%)                              |
| Nightmare                                   | 1 (0.3%)                             | 1 (0.3%)                              |

|                                        | <b>Bictegravir group<br/>(n=320)</b> | <b>Dolutegravir group<br/>(n=325)</b> |
|----------------------------------------|--------------------------------------|---------------------------------------|
| Pollakiuria                            | 0                                    | 2 (0.6%)                              |
| Sleep disorder                         | 2 (0.6%)                             | 0                                     |
| Abdominal pain lower                   | 1 (0.3%)                             | 0                                     |
| Alanine aminotransferase increased     | 0                                    | 1 (0.3%)                              |
| Aspartate aminotransferase increased   | 0                                    | 1 (0.3%)                              |
| Atrial flutter                         | 1 (0.3%)                             | 0                                     |
| Atrioventricular block first degree    | 0                                    | 1 (0.3%)                              |
| Blood creatine phosphokinase increased | 1 (0.3%)                             | 0                                     |
| Breast pain                            | 0                                    | 1 (0.3%)                              |
| Bruxism                                | 1 (0.3%)                             | 0                                     |
| Conjunctivitis                         | 0                                    | 1 (0.3%)                              |
| Deep vein thrombosis                   | 0                                    | 1 (0.3%)                              |
| Dehydration                            | 1 (0.3%)                             | 0                                     |
| Disturbance in attention               | 1 (0.3%)                             | 0                                     |
| Dry mouth                              | 0                                    | 1 (0.3%)                              |
| Eczema                                 | 1 (0.3%)                             | 0                                     |
| Eosinophil count increased             | 0                                    | 1 (0.3%)                              |
| Faeces soft                            | 1 (0.3%)                             | 0                                     |
| Frequent bowel movements               | 1 (0.3%)                             | 0                                     |
| Gastritis                              | 0                                    | 1 (0.3%)                              |
| Gastrointestinal disorder              | 0                                    | 1 (0.3%)                              |
| Haematoma                              | 1 (0.3%)                             | 0                                     |
| Hyperhidrosis                          | 0                                    | 1 (0.3%)                              |
| Hypertriglyceridaemia                  | 0                                    | 1 (0.3%)                              |
| Hypophosphataemia                      | 1 (0.3%)                             | 0                                     |
| Initial insomnia                       | 0                                    | 1 (0.3%)                              |
| Intestinal transit time increased      | 1 (0.3%)                             | 0                                     |
| Leukopenia                             | 1 (0.3%)                             | 0                                     |
| Libido decreased                       | 1 (0.3%)                             | 0                                     |
| Lipoatrophy                            | 0                                    | 1 (0.3%)                              |
| Liver function test increased          | 1 (0.3%)                             | 0                                     |
| Loss of libido                         | 0                                    | 1 (0.3%)                              |
| Low density lipoprotein increased      | 0                                    | 1 (0.3%)                              |
| Memory impairment                      | 1 (0.3%)                             | 0                                     |
| Mood swings                            | 0                                    | 1 (0.3%)                              |
| Muscle fatigue                         | 1 (0.3%)                             | 0                                     |
| Muscle spasms                          | 0                                    | 1 (0.3%)                              |
| Musculoskeletal pain                   | 1 (0.3%)                             | 0                                     |
| Nasal congestion                       | 0                                    | 1 (0.3%)                              |
| Night sweats                           | 1 (0.3%)                             | 0                                     |



|                     | <b>Bictegravir group<br/>(n=320)</b> | <b>Dolutegravir group<br/>(n=325)</b> |
|---------------------|--------------------------------------|---------------------------------------|
| Oedema peripheral   | 1 (0.3%)                             | 0                                     |
| Pain in extremity   | 0                                    | 1 (0.3%)                              |
| Pancreatitis acute  | 1 (0.3%)                             | 0                                     |
| Paraesthesia        | 0                                    | 1 (0.3%)                              |
| Polyuria            | 1 (0.3%)                             | 0                                     |
| Pruritus            | 0                                    | 1 (0.3%)                              |
| Pyrexia             | 1 (0.3%)                             | 0                                     |
| Renal colic         | 0                                    | 1 (0.3%)                              |
| Rhinorrhoea         | 0                                    | 1 (0.3%)                              |
| Skin lesion         | 1 (0.3%)                             | 0                                     |
| Skin odour abnormal | 1 (0.3%)                             | 0                                     |
| Suicide attempt     | 1 (0.3%)                             | 0                                     |
| Syncope             | 0                                    | 1 (0.3%)                              |
| Tension headache    | 1 (0.3%)                             | 0                                     |

Data are n (%), relatedness to study drug is assessed by the investigator.

Appendix Table 3. Grade 3 or 4 laboratory abnormalities in ≥2% of participants in either group

|                                                    | <b>Bictegravir group<br/>(n=320)</b> | <b>Dolutegravir group<br/>(n=325)</b> |
|----------------------------------------------------|--------------------------------------|---------------------------------------|
| Any Grade 3 or 4 Treatment-Emergent Toxicity Grade | 66/313 (21.0%)                       | 61/325 (18.8%)                        |
| Neutrophils (Decreased)                            | 9/313 (2.9%)                         | 3/325 (0.9%)                          |
| Amylase (Increased)                                | 7/313 (2.2%)                         | 9/325 (2.8%)                          |
| ALT (Increased)                                    | 9/313 (2.9%)                         | 4/325 (1.2%)                          |
| AST (increased)                                    | 5/313 (1.6%)                         | 9/325 (2.8%)                          |
| Creatine Kinase (Increased)                        | 17/313 (5.4%)                        | 11/325 (3.4%)                         |
| Serum Glucose (Fasting, increased)                 | 3/312 (1.0%)                         | 10/325 (3.1%)                         |
| LDL (Fasting, Increased)*                          | 11/305 (3.6%)                        | 14/317 (4.4%)                         |
| Urine Glucose (Glycosuria)                         | 3/313 (1.0%)                         | 10/325 (3.1%)                         |

ALT, alanine aminotransferase; AST, aspartate aminotransferase; LDL, low-density lipoprotein

The denominator for percentage is the number of subjects with at least 1 postbaseline value for the test under evaluation.

\*Only fasting LDL measurements are summarized.

Appendix Table 4. Changes from baseline in renal and fasting metabolic laboratory parameters at week 96

| Metabolic Assessment           | Bictegravir group<br>(n=320) |                      | Dolutegravir group<br>(n=325) |                      | p-value |
|--------------------------------|------------------------------|----------------------|-------------------------------|----------------------|---------|
|                                | n                            | Median (Q1, Q3)      | n                             | Median (Q1, Q3)      |         |
| Serum creatinine               |                              |                      |                               |                      |         |
| Baseline                       | 320                          | 0.91 (0.80, 1.02)    | 325                           | 0.89 (0.79, 1.00)    | 0.10    |
| Change at Week 96              | 271                          | 0.10 (0.01, 0.17)    | 287                           | 0.11 (0.04, 0.18)    | 0.082   |
| eGFR*                          |                              |                      |                               |                      |         |
| Baseline                       | 320                          | 120.4 (100.8, 141.8) | 325                           | 120.6 (102.8, 145.1) | 0.27    |
| Change at Week 96              | 271                          | -6.9 (-16.8, 2.3)    | 287                           | -9.0 (-19.2, 1.9)    | 0.10    |
| Total cholesterol (mg/dL)      |                              |                      |                               |                      |         |
| Baseline                       | 314                          | 156 (136, 182)       | 321                           | 161 (138, 186)       | 0.30    |
| Change at Week 96              | 262                          | 17 (-1, 35)          | 279                           | 16 (-2, 34)          | 0.51    |
| Direct LDL (mg/dL)             |                              |                      |                               |                      |         |
| Baseline                       | 314                          | 98 (81, 120)         | 321                           | 99 (82, 124)         | 0.46    |
| Change at Week 96              | 262                          | 19 (4, 36)           | 279                           | 16 (0, 32)           | 0.24    |
| Triglycerides (mg/dL)          |                              |                      |                               |                      |         |
| Baseline                       | 314                          | 97 (72, 134)         | 321                           | 95 (70, 131)         | 0.40    |
| Change at Week 96              | 262                          | 6 (-17, 39)          | 279                           | 6 (-17, 32)          | 0.79    |
| HDL (mg/dL)                    |                              |                      |                               |                      |         |
| Baseline                       | 314                          | 43 (35, 52)          | 321                           | 43 (35, 52)          | 0.97    |
| Change at Week 96              | 262                          | 4 (-1, 9)            | 279                           | 5 (-1, 12)           | 0.23    |
| Total cholesterol to HDL ratio |                              |                      |                               |                      |         |
| Baseline                       | 314                          | 3.7 (3.0, 4.5)       | 321                           | 3.7 (3.1, 4.5)       | 0.85    |
| Change at Week 96              | 262                          | 0.0 (-0.5, 0.5)      | 279                           | -0.1 (-0.6, 0.5)     | 0.14    |
| Glucose (mg/dL)                |                              |                      |                               |                      |         |
| Baseline                       | 318                          | 89 (83, 96)          | 322                           | 88 (81, 94)          | 0.11    |
| Change at Week 96              | 272                          | 4 (-2, 11)           | 285                           | 4 (-2, 12)           | 0.33    |

eGFR, estimated glomerular filtration rate; HDL, high density lipoprotein; LDL, low density lipoprotein; Q, quartile

\*By Cockcroft-Gault.

Only lipid and glucose measurements under fasting status were summarized.

P-values were from the 2-sided Wilcoxon rank sum test to compare the 2 treatment groups.
